# Supplementary material for: Covalent Modification by Glyoxals Converts Cytochrome c Into its Apoptotically Competent State
Source: PubMed Central journal article supplement (PMC6423144; doi:10.1038/s41598-019-41282-2), 2019-03-18
Supplement: 41598_2019_41282_MOESM1_ESM.pdf [file 41598_2019_41282_MOESM1_ESM.pdf]

## SUPPLEMENTARY INFORMATION

### **Covalent Modification by Glyoxals Converts Cytochrome c Into its Apoptotically Competent State**

**Gurumayum Suraj Sharma<sup>1,2</sup>, Marina Warepam<sup>3</sup>, Reshmee Bhattacharya<sup>1</sup> and Laishram Rajendrakumar Singh<sup>1\*</sup>**

<sup>1</sup>Dr. B. R. Ambedkar Center for Biomedical Research, University of Delhi, Delhi-110007, India

<sup>2</sup>Department of Botany, Zakir Husain Delhi College, University of Delhi, New Delhi-110002, India

<sup>3</sup>Department of Biotechnology, Manipur University, Canchipur, Imphal East, Manipur-795003

**\*Correspondence Author:** [lrsingh@acbr.du.ac.in](mailto:lrsingh@acbr.du.ac.in), [lairsingh@gmail.com](mailto:lairsingh@gmail.com) (Dr. Laishram Rajendrakumar Singh)

Mobile: +91 9811630757

**Running Title: Structural and Functional Status of Cytochrome c Upon Glycation.**

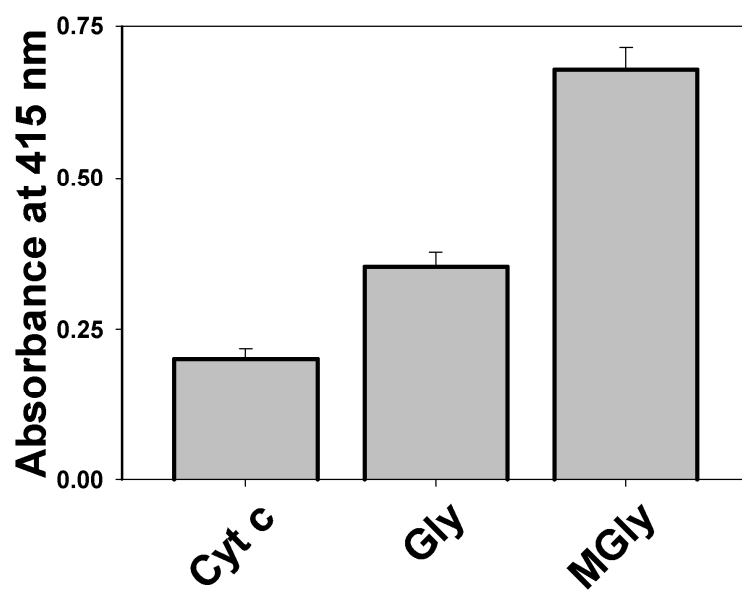

**Figure S1: Peroxidase activity of native and modified Cyt c.** Activity was measured with ABTS and H<sub>2</sub>O<sub>2</sub> (100  $\mu$ M and 1 mM respectively) by flowing the absorption at 415 nm.

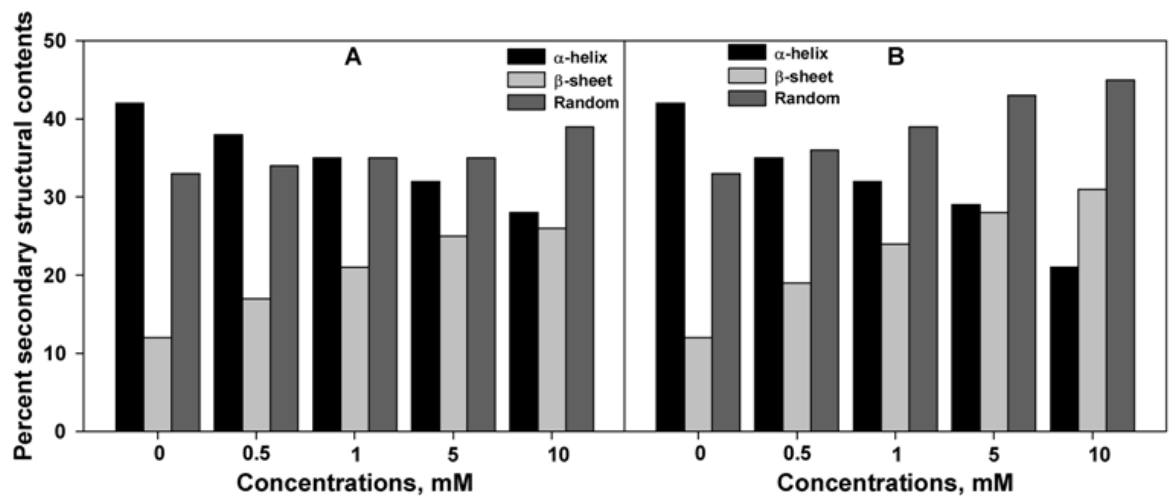

**Figure S2: Secondary structural composition of Cyt c modified with increasing concentration of Gly and MGly (0-10 mM).**

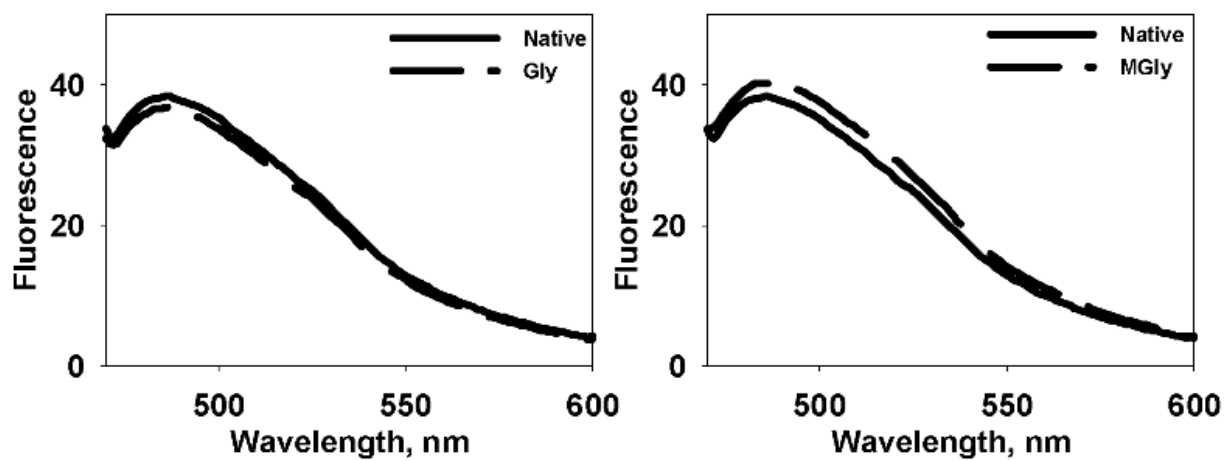

**Figure S3: ThT fluorescence spectra of native and modified Cyt c.** Only spectra of native and Cyt c modified with 10 mM glyoxals are shown.
